# Supplementary material for: Impact of ramucirumab plus erlotinib on circulating cell-free DNA from patients with untreated metastatic non-small cell lung cancer with EGFR-activating mutations (RELAY phase 3 randomized study)
Source: PubMed Central journal article supplement — Transl Lung Cancer Res. 2023 Aug 10;12(8):1702–16. doi: 10.21037/tlcr-22-736 (PMC10483085; doi:10.21037/tlcr-22-736), 2023-08-10
Supplement: tlcr-12-08-1702-coif.pdf [file tlcr-12-08-1702-coif.pdf]

## ICMJE DISCLOSURE FORM

Date: 6/22/2022  
 Your Name: Kazuto Nishio  
 Manuscript Title: Impact of ramucirumab plus erlotinib on circulating cell-free DNA from patients with untreated metastatic non-small cell lung cancer with EGFR-activating mutations (RELAY phase 3 randomized study)  
 Manuscript number (if known): \_\_\_\_\_

In the interest of transparency, we ask you to disclose all relationships/activities/interests listed below that are related to the content of your manuscript. "Related" means any relation with for-profit or not-for-profit third parties whose interests may be affected by the content of the manuscript. Disclosure represents a commitment to transparency and does not necessarily indicate a bias. If you are in doubt about whether to list a relationship/activity/interest, it is preferable that you do so.

The following questions apply to the author's relationships/activities/interests as they relate to the current manuscript only.

The author's relationships/activities/interests should be defined broadly. For example, if your manuscript pertains to the epidemiology of hypertension, you should declare all relationships with manufacturers of antihypertensive medication, even if that medication is not mentioned in the manuscript.

In item #1 below, report all support for the work reported in this manuscript without time limit. For all other items, the time frame for disclosure is the past 36 months.

|                                                           |                                                                                                                                                                                | Name all entities with whom you have this relationship or indicate none (add rows as needed) | Specifications/Comments (e.g., if payments were made to you or to your institution) |
|-----------------------------------------------------------|--------------------------------------------------------------------------------------------------------------------------------------------------------------------------------|----------------------------------------------------------------------------------------------|-------------------------------------------------------------------------------------|
| <b>Time frame: Since the initial planning of the work</b> |                                                                                                                                                                                |                                                                                              |                                                                                     |
| 1                                                         | All support for the present manuscript (e.g., funding, provision of study materials, medical writing, article processing charges, etc.)<br><b>No time limit for this item.</b> | Eli Lilly and Company                                                                        | Eli Lilly funded all support for the present manuscript                             |
|                                                           |                                                                                                                                                                                |                                                                                              |                                                                                     |
|                                                           |                                                                                                                                                                                |                                                                                              |                                                                                     |
|                                                           |                                                                                                                                                                                |                                                                                              |                                                                                     |
|                                                           |                                                                                                                                                                                |                                                                                              |                                                                                     |
|                                                           |                                                                                                                                                                                |                                                                                              |                                                                                     |
| <b>Time frame: past 36 months</b>                         |                                                                                                                                                                                |                                                                                              |                                                                                     |
| 2                                                         | Grants or contracts from any entity (if not indicated in item #1 above).                                                                                                       | Nippon Boehringer Ingelheim                                                                  |                                                                                     |
|                                                           |                                                                                                                                                                                | West Japan Oncology Group                                                                    |                                                                                     |
|                                                           |                                                                                                                                                                                | Thoracic Oncology Research Group                                                             |                                                                                     |
|                                                           |                                                                                                                                                                                | North East Japan Study Group                                                                 |                                                                                     |

|    |                                                                                                              |                                          |                        |
|----|--------------------------------------------------------------------------------------------------------------|------------------------------------------|------------------------|
|    |                                                                                                              | Clinical Research Support Center Kyushu  |                        |
|    |                                                                                                              | Eli Lilly Japan                          |                        |
|    |                                                                                                              | Hitachi                                  |                        |
|    |                                                                                                              | SYSMEX                                   |                        |
|    |                                                                                                              | Nichirei Biosciences Inc.                |                        |
|    |                                                                                                              | Osakaminami hospital                     |                        |
| 3  | Royalties or licenses                                                                                        | <input checked="" type="checkbox"/> None |                        |
|    |                                                                                                              |                                          |                        |
|    |                                                                                                              |                                          |                        |
| 4  | Consulting fees                                                                                              | SymBio Pharmaceuticals                   |                        |
|    |                                                                                                              | Solasia Pharma                           |                        |
|    |                                                                                                              | ELI LILLY JAPAN                          |                        |
|    |                                                                                                              | Otsuka Pharmaceutical                    |                        |
| 5  | Payment or honoraria for lectures, presentations, speakers bureaus, manuscript writing or educational events | Boehringer Ingelheim Japan               | honoraria for lectures |
|    |                                                                                                              | AstraZeneca                              | honoraria for lectures |
|    |                                                                                                              | Chugai                                   | honoraria for lectures |
|    |                                                                                                              | Novartis Pharma                          | honoraria for lectures |
|    |                                                                                                              | Eisai                                    | honoraria for lectures |
|    |                                                                                                              | Bristol-Myers Squibb                     | honoraria for lectures |
|    |                                                                                                              | MSD                                      | honoraria for lectures |
|    |                                                                                                              | Ono Pharmaceutical                       | honoraria for lectures |
|    |                                                                                                              | Pfizer                                   | honoraria for lectures |
|    |                                                                                                              | Sanofi                                   | honoraria for lectures |
|    |                                                                                                              | Guardant Health                          | honoraria for lectures |
|    |                                                                                                              | ELI LILLY JAPAN.                         | honoraria for lectures |
|    |                                                                                                              | Amgen                                    | honoraria for lectures |
|    |                                                                                                              | Merck Biopharma                          | honoraria for lectures |
|    |                                                                                                              | Roche Diagnostics                        | honoraria for lectures |
|    |                                                                                                              | Yakult Honsha                            | honoraria for lectures |
|    |                                                                                                              | Takeda pharmaceuticals                   | honoraria for lectures |
|    |                                                                                                              | FUJIREBIO                                | honoraria for lectures |
|    |                                                                                                              | Janssen Pharmaceutical                   | honoraria for lectures |
| 6  | Payment for expert testimony                                                                                 | <input checked="" type="checkbox"/> None |                        |
|    |                                                                                                              |                                          |                        |
|    |                                                                                                              |                                          |                        |
| 7  | Support for attending meetings and/or travel                                                                 | <input checked="" type="checkbox"/> None |                        |
|    |                                                                                                              |                                          |                        |
|    |                                                                                                              |                                          |                        |
| 8  | Patents planned, issued or pending                                                                           | <input checked="" type="checkbox"/> None |                        |
|    |                                                                                                              |                                          |                        |
|    |                                                                                                              |                                          |                        |
| 9  | Participation on a Data Safety Monitoring Board or Advisory Board                                            | <input checked="" type="checkbox"/> None |                        |
|    |                                                                                                              |                                          |                        |
|    |                                                                                                              |                                          |                        |
| 10 | Leadership or fiduciary role in other board, society,                                                        | <input checked="" type="checkbox"/> None |                        |
|    |                                                                                                              |                                          |                        |

|    |                                                                                  |                                          |  |
|----|----------------------------------------------------------------------------------|------------------------------------------|--|
|    | committee or advocacy group, paid or unpaid                                      |                                          |  |
| 11 | Stock or stock options                                                           | <input checked="" type="checkbox"/> None |  |
|    |                                                                                  |                                          |  |
|    |                                                                                  |                                          |  |
| 12 | Receipt of equipment, materials, drugs, medical writing, gifts or other services | <input checked="" type="checkbox"/> None |  |
|    |                                                                                  |                                          |  |
|    |                                                                                  |                                          |  |
| 13 | Other financial or non-financial interests                                       | <input checked="" type="checkbox"/> None |  |
|    |                                                                                  |                                          |  |
|    |                                                                                  |                                          |  |

**Please summarize the above conflict of interest in the following box:**

The author reports the funding from Eli Lilly and Company, grants or contracts from Eli Lilly Japan, Clinical Research Support Center Kyushu, Hitachi, Nichirei Biosciences, Nippon Boehringer Ingelheim, North East Japan Study Group, Osakaminami Hospital, Sysmex Corporation, Thoracic Oncology Research Group, and West Japan Oncology Group; consulting fees from Eli Lilly Japan, Otsuka Pharmaceutical, Solasia Pharma, and SymBio Pharmaceuticals; and honoraria for lectures from Amgen, AstraZeneca, Boehringer Ingelheim Japan, Bristol Myers Squibb, Chugai Pharmaceutical, Eisai, Eli Lilly Japan, Fujirebio, Guardant Health, Janssen, Merck Biopharma, Merck Sharp & Dohme, Novartis, Ono Pharmaceutical, Pfizer, Roche Diagnostics, Sanofi, Takeda, and Yakult Honsha.

**Please place an "X" next to the following statement to indicate your agreement:**

I certify that I have answered every question and have not altered the wording of any of the questions on this form.

## ICMJE DISCLOSURE FORM

Date: 6/22/2022

Your Name: Kazuko Sakai

Manuscript Title: Impact of ramucirumab plus erlotinib on circulating cell-free DNA from patients with untreated metastatic non-small cell lung cancer with EGFR-activating mutations (RELAY phase 3 randomized study)

Manuscript number (if known): \_\_\_\_\_

In the interest of transparency, we ask you to disclose all relationships/activities/interests listed below that are related to the content of your manuscript. "Related" means any relation with for-profit or not-for-profit third parties whose interests may be affected by the content of the manuscript. Disclosure represents a commitment to transparency and does not necessarily indicate a bias. If you are in doubt about whether to list a relationship/activity/interest, it is preferable that you do so.

The following questions apply to the author's relationships/activities/interests as they relate to the current manuscript only.

The author's relationships/activities/interests should be defined broadly. For example, if your manuscript pertains to the epidemiology of hypertension, you should declare all relationships with manufacturers of antihypertensive medication, even if that medication is not mentioned in the manuscript.

In item #1 below, report all support for the work reported in this manuscript without time limit. For all other items, the time frame for disclosure is the past 36 months.

|                                                           |                                                                                                                                                                                | Name all entities with whom you have this relationship or indicate none (add rows as needed) | Specifications/Comments (e.g., if payments were made to you or to your institution) |
|-----------------------------------------------------------|--------------------------------------------------------------------------------------------------------------------------------------------------------------------------------|----------------------------------------------------------------------------------------------|-------------------------------------------------------------------------------------|
| <b>Time frame: Since the initial planning of the work</b> |                                                                                                                                                                                |                                                                                              |                                                                                     |
| 1                                                         | All support for the present manuscript (e.g., funding, provision of study materials, medical writing, article processing charges, etc.)<br><b>No time limit for this item.</b> | Eli Lilly and Company                                                                        | Eli Lilly funded all support for the present manuscript                             |
|                                                           |                                                                                                                                                                                |                                                                                              |                                                                                     |
|                                                           |                                                                                                                                                                                |                                                                                              |                                                                                     |
|                                                           |                                                                                                                                                                                |                                                                                              |                                                                                     |
|                                                           |                                                                                                                                                                                |                                                                                              |                                                                                     |
|                                                           |                                                                                                                                                                                |                                                                                              |                                                                                     |
| <b>Time frame: past 36 months</b>                         |                                                                                                                                                                                |                                                                                              |                                                                                     |
| 2                                                         | Grants or contracts from any entity (if not indicated in item #1 above).                                                                                                       | <input checked="" type="checkbox"/> None                                                     |                                                                                     |
|                                                           |                                                                                                                                                                                |                                                                                              |                                                                                     |
|                                                           |                                                                                                                                                                                |                                                                                              |                                                                                     |
| 3                                                         | Royalties or licenses                                                                                                                                                          | <input checked="" type="checkbox"/> None                                                     |                                                                                     |
|                                                           |                                                                                                                                                                                |                                                                                              |                                                                                     |
|                                                           |                                                                                                                                                                                |                                                                                              |                                                                                     |
| 4                                                         | Consulting fees                                                                                                                                                                | <input checked="" type="checkbox"/> None                                                     |                                                                                     |
|                                                           |                                                                                                                                                                                |                                                                                              |                                                                                     |
|                                                           |                                                                                                                                                                                |                                                                                              |                                                                                     |

|    |                                                                                                              |                                          |  |
|----|--------------------------------------------------------------------------------------------------------------|------------------------------------------|--|
|    |                                                                                                              |                                          |  |
| 5  | Payment or honoraria for lectures, presentations, speakers bureaus, manuscript writing or educational events | <input checked="" type="checkbox"/> None |  |
| 6  | Payment for expert testimony                                                                                 | <input checked="" type="checkbox"/> None |  |
| 7  | Support for attending meetings and/or travel                                                                 | <input checked="" type="checkbox"/> None |  |
| 8  | Patents planned, issued or pending                                                                           | <input checked="" type="checkbox"/> None |  |
| 9  | Participation on a Data Safety Monitoring Board or Advisory Board                                            | <input checked="" type="checkbox"/> None |  |
| 10 | Leadership or fiduciary role in other board, society, committee or advocacy group, paid or unpaid            | <input checked="" type="checkbox"/> None |  |
| 11 | Stock or stock options                                                                                       | <input checked="" type="checkbox"/> None |  |
| 12 | Receipt of equipment, materials, drugs, medical writing, gifts or other services                             | <input checked="" type="checkbox"/> None |  |
| 13 | Other financial or non-financial interests                                                                   | <input checked="" type="checkbox"/> None |  |

**Please summarize the above conflict of interest in the following box:**

The author reports the funding from Eli Lilly and Company.

**Please place an "X" next to the following statement to indicate your agreement:**

**X I certify that I have answered every question and have not altered the wording of any of the questions on this form.**

## ICMJE DISCLOSURE FORM

Date: 7/19/2022  
 Your Name: Makoto Nishio  
 Manuscript Title: Impact of ramucirumab plus erlotinib on circulating cell-free DNA from patients with untreated metastatic non-small cell lung cancer with EGFR-activating mutations (RELAY phase 3 randomized study)  
 Manuscript number (if known): \_\_\_\_\_

In the interest of transparency, we ask you to disclose all relationships/activities/interests listed below that are related to the content of your manuscript. "Related" means any relation with for-profit or not-for-profit third parties whose interests may be affected by the content of the manuscript. Disclosure represents a commitment to transparency and does not necessarily indicate a bias. If you are in doubt about whether to list a relationship/activity/interest, it is preferable that you do so.

The following questions apply to the author's relationships/activities/interests as they relate to the current manuscript only.

The author's relationships/activities/interests should be defined broadly. For example, if your manuscript pertains to the epidemiology of hypertension, you should declare all relationships with manufacturers of antihypertensive medication, even if that medication is not mentioned in the manuscript.

In item #1 below, report all support for the work reported in this manuscript without time limit. For all other items, the time frame for disclosure is the past 36 months.

|                                                           |                                                                                                                                                                                | Name all entities with whom you have this relationship or indicate none (add rows as needed) | Specifications/Comments (e.g., if payments were made to you or to your institution) |
|-----------------------------------------------------------|--------------------------------------------------------------------------------------------------------------------------------------------------------------------------------|----------------------------------------------------------------------------------------------|-------------------------------------------------------------------------------------|
| <b>Time frame: Since the initial planning of the work</b> |                                                                                                                                                                                |                                                                                              |                                                                                     |
| 1                                                         | All support for the present manuscript (e.g., funding, provision of study materials, medical writing, article processing charges, etc.)<br><b>No time limit for this item.</b> | Eli Lilly and Company                                                                        | Eli Lilly funded all support for the present manuscript                             |
|                                                           |                                                                                                                                                                                |                                                                                              |                                                                                     |
|                                                           |                                                                                                                                                                                |                                                                                              |                                                                                     |
|                                                           |                                                                                                                                                                                |                                                                                              |                                                                                     |
|                                                           |                                                                                                                                                                                |                                                                                              |                                                                                     |
|                                                           |                                                                                                                                                                                |                                                                                              |                                                                                     |
| <b>Time frame: past 36 months</b>                         |                                                                                                                                                                                |                                                                                              |                                                                                     |
| 2                                                         | Grants or contracts from any entity (if not indicated in item #1 above).                                                                                                       | <input checked="" type="checkbox"/> None                                                     |                                                                                     |
|                                                           |                                                                                                                                                                                |                                                                                              |                                                                                     |
| 3                                                         | Royalties or licenses                                                                                                                                                          | <input checked="" type="checkbox"/> None                                                     |                                                                                     |
|                                                           |                                                                                                                                                                                |                                                                                              |                                                                                     |
| 4                                                         | Consulting fees                                                                                                                                                                | <input checked="" type="checkbox"/> None                                                     |                                                                                     |
|                                                           |                                                                                                                                                                                |                                                                                              |                                                                                     |

|    |                                                                                                              |                                          |  |
|----|--------------------------------------------------------------------------------------------------------------|------------------------------------------|--|
|    |                                                                                                              |                                          |  |
| 5  | Payment or honoraria for lectures, presentations, speakers bureaus, manuscript writing or educational events | <input checked="" type="checkbox"/> None |  |
| 6  | Payment for expert testimony                                                                                 | <input checked="" type="checkbox"/> None |  |
| 7  | Support for attending meetings and/or travel                                                                 | <input checked="" type="checkbox"/> None |  |
| 8  | Patents planned, issued or pending                                                                           | <input checked="" type="checkbox"/> None |  |
| 9  | Participation on a Data Safety Monitoring Board or Advisory Board                                            | <input checked="" type="checkbox"/> None |  |
| 10 | Leadership or fiduciary role in other board, society, committee or advocacy group, paid or unpaid            | <input checked="" type="checkbox"/> None |  |
| 11 | Stock or stock options                                                                                       | <input checked="" type="checkbox"/> None |  |
| 12 | Receipt of equipment, materials, drugs, medical writing, gifts or other services                             | <input checked="" type="checkbox"/> None |  |
| 13 | Other financial or non-financial interests                                                                   | <input checked="" type="checkbox"/> None |  |

**Please summarize the above conflict of interest in the following box:**

The author reports the funding from Eli Lilly and Company.

**Please place an "X" next to the following statement to indicate your agreement:**

**X I certify that I have answered every question and have not altered the wording of any of the questions on this form.**

## ICMJE DISCLOSURE FORM

Date: 7/19/2022

Your Name: Takashi Seto

Manuscript Title: Impact of ramucirumab plus erlotinib on circulating cell-free DNA from patients with untreated metastatic non-small cell lung cancer with EGFR-activating mutations (RELAY phase 3 randomized study)

Manuscript number (if known): \_\_\_\_\_

In the interest of transparency, we ask you to disclose all relationships/activities/interests listed below that are related to the content of your manuscript. "Related" means any relation with for-profit or not-for-profit third parties whose interests may be affected by the content of the manuscript. Disclosure represents a commitment to transparency and does not necessarily indicate a bias. If you are in doubt about whether to list a relationship/activity/interest, it is preferable that you do so.

The following questions apply to the author's relationships/activities/interests as they relate to the current manuscript only.

The author's relationships/activities/interests should be defined broadly. For example, if your manuscript pertains to the epidemiology of hypertension, you should declare all relationships with manufacturers of antihypertensive medication, even if that medication is not mentioned in the manuscript.

In item #1 below, report all support for the work reported in this manuscript without time limit. For all other items, the time frame for disclosure is the past 36 months.

|                                                           |                                                                                                                                                                                | Name all entities with whom you have this relationship or indicate none (add rows as needed) | Specifications/Comments (e.g., if payments were made to you or to your institution) |
|-----------------------------------------------------------|--------------------------------------------------------------------------------------------------------------------------------------------------------------------------------|----------------------------------------------------------------------------------------------|-------------------------------------------------------------------------------------|
| <b>Time frame: Since the initial planning of the work</b> |                                                                                                                                                                                |                                                                                              |                                                                                     |
| 1                                                         | All support for the present manuscript (e.g., funding, provision of study materials, medical writing, article processing charges, etc.)<br><b>No time limit for this item.</b> | Eli Lilly and Company                                                                        | Eli Lilly funded all support for the present manuscript                             |
|                                                           |                                                                                                                                                                                |                                                                                              |                                                                                     |
|                                                           |                                                                                                                                                                                |                                                                                              |                                                                                     |
|                                                           |                                                                                                                                                                                |                                                                                              |                                                                                     |
|                                                           |                                                                                                                                                                                |                                                                                              |                                                                                     |
|                                                           |                                                                                                                                                                                |                                                                                              |                                                                                     |
|                                                           |                                                                                                                                                                                |                                                                                              |                                                                                     |
| <b>Time frame: past 36 months</b>                         |                                                                                                                                                                                |                                                                                              |                                                                                     |
| 2                                                         | Grants or contracts from any entity (if not indicated in item #1 above).                                                                                                       | Abbvie                                                                                       | My Institution                                                                      |
|                                                           |                                                                                                                                                                                | Chugai Pharmaceutical                                                                        | My Institution                                                                      |
|                                                           |                                                                                                                                                                                | Daiichi Sankyo                                                                               | My Institution                                                                      |
|                                                           |                                                                                                                                                                                | Eli Lilly Japan                                                                              | My Institution                                                                      |
|                                                           |                                                                                                                                                                                | Kissei Pharmaceutical                                                                        | My Institution                                                                      |
|                                                           |                                                                                                                                                                                | MSD                                                                                          | My Institution                                                                      |
|                                                           |                                                                                                                                                                                | Novartis Pharma                                                                              | My Institution                                                                      |
|                                                           |                                                                                                                                                                                | Pfizer Japan                                                                                 | My Institution                                                                      |



|                     |                                                                                                              | Takeda Pharmaceutical                    | My Institution         |
|---------------------|--------------------------------------------------------------------------------------------------------------|------------------------------------------|------------------------|
| 3                   | Royalties or licenses                                                                                        | <input checked="" type="checkbox"/> None |                        |
| 4                   | Consulting fees                                                                                              | <input checked="" type="checkbox"/> None |                        |
| 5                   | Payment or honoraria for lectures, presentations, speakers bureaus, manuscript writing or educational events | AstraZeneca                              | honoraria for lectures |
|                     |                                                                                                              | Bristol-Myers Squibb                     | honoraria for lectures |
|                     |                                                                                                              | Chugai Pharmaceutical                    | honoraria for lectures |
|                     |                                                                                                              | Covidien Japan                           | honoraria for lectures |
|                     |                                                                                                              | Daichi Sankyo                            | honoraria for lectures |
|                     |                                                                                                              | Eli Lilly Japan                          | honoraria for lectures |
|                     |                                                                                                              | Kyowa Hakko Kirin                        | honoraria for lectures |
|                     |                                                                                                              | MSD                                      | honoraria for lectures |
|                     |                                                                                                              | Mochida Pharmaceutical                   | honoraria for lectures |
|                     |                                                                                                              | Nippon Boehringer Ingelheim              | honoraria for lectures |
|                     |                                                                                                              | Novartis Pharma                          | honoraria for lectures |
|                     |                                                                                                              | Ono Pharmaceutical                       | honoraria for lectures |
|                     |                                                                                                              | Pfizer Japan                             | honoraria for lectures |
|                     |                                                                                                              | Taiho Pharmaceutical                     | honoraria for lectures |
|                     |                                                                                                              | Takeda Pharmaceutical                    | honoraria for lectures |
| Towa Pharmaceutical | honoraria for lectures                                                                                       |                                          |                        |
| 6                   | Payment for expert testimony                                                                                 | <input checked="" type="checkbox"/> None |                        |
| 7                   | Support for attending meetings and/or travel                                                                 | <input checked="" type="checkbox"/> None |                        |
|                     |                                                                                                              |                                          |                        |
|                     |                                                                                                              |                                          |                        |
| 8                   | Patents planned, issued or pending                                                                           | <input checked="" type="checkbox"/> None |                        |
| 9                   | Participation on a Data Safety Monitoring Board or Advisory Board                                            | <input checked="" type="checkbox"/> None |                        |
|                     |                                                                                                              |                                          |                        |
|                     |                                                                                                              |                                          |                        |
| 10                  | Leadership or fiduciary role in other board, society, committee or advocacy group, paid or unpaid            | <input checked="" type="checkbox"/> None |                        |
|                     |                                                                                                              |                                          |                        |
| 11                  | Stock or stock options                                                                                       | <input checked="" type="checkbox"/> None |                        |
|                     |                                                                                                              |                                          |                        |
|                     |                                                                                                              |                                          |                        |
| 12                  | Receipt of equipment, materials, drugs, medical writing, gifts or other services                             | <input checked="" type="checkbox"/> None |                        |
|                     |                                                                                                              |                                          |                        |
|                     |                                                                                                              |                                          |                        |

|    |                                            |                         |            |
|----|--------------------------------------------|-------------------------|------------|
| 13 | Other financial or non-financial interests | Precision Medicine Asia | employment |
|    |                                            |                         |            |
|    |                                            |                         |            |

**Please summarize the above conflict of interest in the following box:**

The author reports the funding from Eli Lilly and Company and grants or contracts to their institution from AbbVie, Chugai Pharmaceutical, Daiichi Sankyo, Eli Lilly Japan, Kissei Pharmaceutical, Merck Sharp & Dohme, Novartis, Pfizer Japan, and Takeda Pharmaceutical; honoraria for lectures from AstraZeneca, Bristol Myers Squibb, Chugai Pharmaceutical, Covidien Japan, Daiichi Sankyo, Eli Lilly Japan, Kyowa Hakko Kirin, Merck Sharp & Dohme, Mochida Pharmaceutical, Nippon Boehringer Ingelheim, Novartis, Ono Pharmaceutical, Pfizer Japan, Taiho Pharmaceutical, Takeda, and Towa Pharmaceutical; and employment with Precision Medicine Asia.

**Please place an “X” next to the following statement to indicate your agreement:**

**X   I certify that I have answered every question and have not altered the wording of any of the questions on this form.**

## ICMJE DISCLOSURE FORM

Date: 9/15/2021

Your Name: Carla Visseren-Grul

Manuscript Title: Impact of ramucirumab plus erlotinib on circulating cell-free DNA from patients with untreated metastatic non-small cell lung cancer with EGFR-activating mutations (RELAY phase 3 randomized study)

Manuscript number (if known): \_\_\_\_\_

In the interest of transparency, we ask you to disclose all relationships/activities/interests listed below that are related to the content of your manuscript. "Related" means any relation with for-profit or not-for-profit third parties whose interests may be affected by the content of the manuscript. Disclosure represents a commitment to transparency and does not necessarily indicate a bias. If you are in doubt about whether to list a relationship/activity/interest, it is preferable that you do so.

The following questions apply to the author's relationships/activities/interests as they relate to the current manuscript only.

The author's relationships/activities/interests should be defined broadly. For example, if your manuscript pertains to the epidemiology of hypertension, you should declare all relationships with manufacturers of antihypertensive medication, even if that medication is not mentioned in the manuscript.

In item #1 below, report all support for the work reported in this manuscript without time limit. For all other items, the time frame for disclosure is the past 36 months.

|                                                           |                                                                                                                                                                                | Name all entities with whom you have this relationship or indicate none (add rows as needed) | Specifications/Comments (e.g., if payments were made to you or to your institution) |
|-----------------------------------------------------------|--------------------------------------------------------------------------------------------------------------------------------------------------------------------------------|----------------------------------------------------------------------------------------------|-------------------------------------------------------------------------------------|
| <b>Time frame: Since the initial planning of the work</b> |                                                                                                                                                                                |                                                                                              |                                                                                     |
| 1                                                         | All support for the present manuscript (e.g., funding, provision of study materials, medical writing, article processing charges, etc.)<br><b>No time limit for this item.</b> | Eli Lilly and Company                                                                        | Eli Lilly funded all support for the present manuscript                             |
|                                                           |                                                                                                                                                                                |                                                                                              |                                                                                     |
|                                                           |                                                                                                                                                                                |                                                                                              |                                                                                     |
|                                                           |                                                                                                                                                                                |                                                                                              |                                                                                     |
|                                                           |                                                                                                                                                                                |                                                                                              |                                                                                     |
|                                                           |                                                                                                                                                                                |                                                                                              |                                                                                     |
| <b>Time frame: past 36 months</b>                         |                                                                                                                                                                                |                                                                                              |                                                                                     |
| 2                                                         | Grants or contracts from any entity (if not indicated in item #1 above).                                                                                                       | <input checked="" type="checkbox"/> None                                                     |                                                                                     |
|                                                           |                                                                                                                                                                                |                                                                                              |                                                                                     |
| 3                                                         | Royalties or licenses                                                                                                                                                          | <input checked="" type="checkbox"/> None                                                     |                                                                                     |
|                                                           |                                                                                                                                                                                |                                                                                              |                                                                                     |
| 4                                                         | Consulting fees                                                                                                                                                                | <input checked="" type="checkbox"/> None                                                     |                                                                                     |
|                                                           |                                                                                                                                                                                |                                                                                              |                                                                                     |

|    |                                                                                                              |                                          |                                                         |
|----|--------------------------------------------------------------------------------------------------------------|------------------------------------------|---------------------------------------------------------|
|    |                                                                                                              |                                          |                                                         |
| 5  | Payment or honoraria for lectures, presentations, speakers bureaus, manuscript writing or educational events | <input checked="" type="checkbox"/> None |                                                         |
| 6  | Payment for expert testimony                                                                                 | <input checked="" type="checkbox"/> None |                                                         |
| 7  | Support for attending meetings and/or travel                                                                 | <input checked="" type="checkbox"/> None |                                                         |
| 8  | Patents planned, issued or pending                                                                           | <input checked="" type="checkbox"/> None |                                                         |
| 9  | Participation on a Data Safety Monitoring Board or Advisory Board                                            | <input checked="" type="checkbox"/> None |                                                         |
| 10 | Leadership or fiduciary role in other board, society, committee or advocacy group, paid or unpaid            | <input checked="" type="checkbox"/> None |                                                         |
| 11 | Stock or stock options                                                                                       | I am an Eli Lilly employee               | I am an Eli Lilly employee and as such hold Lilly stock |
| 12 | Receipt of equipment, materials, drugs, medical writing, gifts or other services                             | <input checked="" type="checkbox"/> None |                                                         |
| 13 | Other financial or non-financial interests                                                                   | <input checked="" type="checkbox"/> None |                                                         |

**Please summarize the above conflict of interest in the following box:**

The author reports the funding from Eli Lilly and Company. The author is also an Eli Lilly employee and as such hold Lilly stock.

**Please place an "X" next to the following statement to indicate your agreement:**

**X I certify that I have answered every question and have not altered the wording of any of the questions on this form.**

## ICMJE DISCLOSURE FORM

Date: 7/20/2022

Your Name: Michelle Carlsen

Manuscript Title: Impact of ramucirumab plus erlotinib on circulating cell-free DNA from patients with untreated metastatic non-small cell lung cancer with EGFR-activating mutations (RELAY phase 3 randomized study)

Manuscript number (if known): \_\_\_\_\_

In the interest of transparency, we ask you to disclose all relationships/activities/interests listed below that are related to the content of your manuscript. "Related" means any relation with for-profit or not-for-profit third parties whose interests may be affected by the content of the manuscript. Disclosure represents a commitment to transparency and does not necessarily indicate a bias. If you are in doubt about whether to list a relationship/activity/interest, it is preferable that you do so.

The following questions apply to the author's relationships/activities/interests as they relate to the current manuscript only.

The author's relationships/activities/interests should be defined broadly. For example, if your manuscript pertains to the epidemiology of hypertension, you should declare all relationships with manufacturers of antihypertensive medication, even if that medication is not mentioned in the manuscript.

In item #1 below, report all support for the work reported in this manuscript without time limit. For all other items, the time frame for disclosure is the past 36 months.

|                                                           |                                                                                                                                                                                | Name all entities with whom you have this relationship or indicate none (add rows as needed) | Specifications/Comments (e.g., if payments were made to you or to your institution) |
|-----------------------------------------------------------|--------------------------------------------------------------------------------------------------------------------------------------------------------------------------------|----------------------------------------------------------------------------------------------|-------------------------------------------------------------------------------------|
| <b>Time frame: Since the initial planning of the work</b> |                                                                                                                                                                                |                                                                                              |                                                                                     |
| 1                                                         | All support for the present manuscript (e.g., funding, provision of study materials, medical writing, article processing charges, etc.)<br><b>No time limit for this item.</b> | Eli Lilly and Company                                                                        | Eli Lilly funded all support for the present manuscript                             |
|                                                           |                                                                                                                                                                                |                                                                                              |                                                                                     |
|                                                           |                                                                                                                                                                                |                                                                                              |                                                                                     |
|                                                           |                                                                                                                                                                                |                                                                                              |                                                                                     |
|                                                           |                                                                                                                                                                                |                                                                                              |                                                                                     |
|                                                           |                                                                                                                                                                                |                                                                                              |                                                                                     |
| <b>Time frame: past 36 months</b>                         |                                                                                                                                                                                |                                                                                              |                                                                                     |
| 2                                                         | Grants or contracts from any entity (if not indicated in item #1 above).                                                                                                       | <input checked="" type="checkbox"/> None                                                     |                                                                                     |
| 3                                                         | Royalties or licenses                                                                                                                                                          | <input checked="" type="checkbox"/> None                                                     |                                                                                     |
| 4                                                         | Consulting fees                                                                                                                                                                | <input checked="" type="checkbox"/> None                                                     |                                                                                     |

|    |                                                                                                              |                                          |  |
|----|--------------------------------------------------------------------------------------------------------------|------------------------------------------|--|
|    |                                                                                                              |                                          |  |
| 5  | Payment or honoraria for lectures, presentations, speakers bureaus, manuscript writing or educational events | <input checked="" type="checkbox"/> None |  |
| 6  | Payment for expert testimony                                                                                 | <input checked="" type="checkbox"/> None |  |
| 7  | Support for attending meetings and/or travel                                                                 | <input checked="" type="checkbox"/> None |  |
| 8  | Patents planned, issued or pending                                                                           | <input checked="" type="checkbox"/> None |  |
| 9  | Participation on a Data Safety Monitoring Board or Advisory Board                                            | <input checked="" type="checkbox"/> None |  |
| 10 | Leadership or fiduciary role in other board, society, committee or advocacy group, paid or unpaid            | <input checked="" type="checkbox"/> None |  |
| 11 | Stock or stock options                                                                                       | Stock of Eli Lilly and Company           |  |
| 12 | Receipt of equipment, materials, drugs, medical writing, gifts or other services                             | <input checked="" type="checkbox"/> None |  |
| 13 | Other financial or non-financial interests                                                                   | Employee of Eli Lilly and Company        |  |

**Please summarize the above conflict of interest in the following box:**

The author reports the funding from Eli Lilly and Company. The author is also an employee and minor shareholder of Eli Lilly and Company.

**Please place an "X" next to the following statement to indicate your agreement:**

**X   I certify that I have answered every question and have not altered the wording of any of the questions on this form.**

## ICMJE DISCLOSURE FORM

Date: :7/20/2022

Your Name: Tomoko Matsui

Manuscript Title: Impact of ramucirumab plus erlotinib on circulating cell-free DNA from patients with untreated metastatic non-small cell lung cancer with EGFR-activating mutations (RELAY phase 3 randomized study)

Manuscript number (if known): \_\_\_\_\_

In the interest of transparency, we ask you to disclose all relationships/activities/interests listed below that are related to the content of your manuscript. "Related" means any relation with for-profit or not-for-profit third parties whose interests may be affected by the content of the manuscript. Disclosure represents a commitment to transparency and does not necessarily indicate a bias. If you are in doubt about whether to list a relationship/activity/interest, it is preferable that you do so.

The following questions apply to the author's relationships/activities/interests as they relate to the current manuscript only.

The author's relationships/activities/interests should be defined broadly. For example, if your manuscript pertains to the epidemiology of hypertension, you should declare all relationships with manufacturers of antihypertensive medication, even if that medication is not mentioned in the manuscript.

In item #1 below, report all support for the work reported in this manuscript without time limit. For all other items, the time frame for disclosure is the past 36 months.

|                                                           |                                                                                                                                                                                | Name all entities with whom you have this relationship or indicate none (add rows as needed) | Specifications/Comments (e.g., if payments were made to you or to your institution) |
|-----------------------------------------------------------|--------------------------------------------------------------------------------------------------------------------------------------------------------------------------------|----------------------------------------------------------------------------------------------|-------------------------------------------------------------------------------------|
| <b>Time frame: Since the initial planning of the work</b> |                                                                                                                                                                                |                                                                                              |                                                                                     |
| 1                                                         | All support for the present manuscript (e.g., funding, provision of study materials, medical writing, article processing charges, etc.)<br><b>No time limit for this item.</b> | Eli Lilly and Company                                                                        | Eli Lilly funded all support for the present manuscript                             |
|                                                           |                                                                                                                                                                                |                                                                                              |                                                                                     |
|                                                           |                                                                                                                                                                                |                                                                                              |                                                                                     |
|                                                           |                                                                                                                                                                                |                                                                                              |                                                                                     |
|                                                           |                                                                                                                                                                                |                                                                                              |                                                                                     |
|                                                           |                                                                                                                                                                                |                                                                                              |                                                                                     |
| <b>Time frame: past 36 months</b>                         |                                                                                                                                                                                |                                                                                              |                                                                                     |
| 2                                                         | Grants or contracts from any entity (if not indicated in item #1 above).                                                                                                       | <input checked="" type="checkbox"/> None                                                     |                                                                                     |
| 3                                                         | Royalties or licenses                                                                                                                                                          | <input checked="" type="checkbox"/> None                                                     |                                                                                     |
| 4                                                         | Consulting fees                                                                                                                                                                | <input checked="" type="checkbox"/> None                                                     |                                                                                     |

|    |                                                                                                              |                                          |  |
|----|--------------------------------------------------------------------------------------------------------------|------------------------------------------|--|
|    |                                                                                                              |                                          |  |
| 5  | Payment or honoraria for lectures, presentations, speakers bureaus, manuscript writing or educational events | <input checked="" type="checkbox"/> None |  |
| 6  | Payment for expert testimony                                                                                 | <input checked="" type="checkbox"/> None |  |
| 7  | Support for attending meetings and/or travel                                                                 | <input checked="" type="checkbox"/> None |  |
| 8  | Patents planned, issued or pending                                                                           | <input checked="" type="checkbox"/> None |  |
| 9  | Participation on a Data Safety Monitoring Board or Advisory Board                                            | <input checked="" type="checkbox"/> None |  |
| 10 | Leadership or fiduciary role in other board, society, committee or advocacy group, paid or unpaid            | <input checked="" type="checkbox"/> None |  |
| 11 | Stock or stock options                                                                                       | <input checked="" type="checkbox"/> None |  |
| 12 | Receipt of equipment, materials, drugs, medical writing, gifts or other services                             | <input checked="" type="checkbox"/> None |  |
| 13 | Other financial or non-financial interests                                                                   | <input checked="" type="checkbox"/> None |  |

**Please summarize the above conflict of interest in the following box:**

The author reports the funding from Eli Lilly and Company. The author is also an employee of Eli Lilly Japan K.K. and is minor shareholder of Eli Lilly and Company.

**Please place an "X" next to the following statement to indicate your agreement:**

**X I certify that I have answered every question and have not altered the wording of any of the questions on this form.**



## ICMJE DISCLOSURE FORM

Date: 7/20/2022

Your Name: Sotaro Enatsu

Manuscript Title: Impact of ramucirumab plus erlotinib on circulating cell-free DNA from patients with untreated metastatic non-small cell lung cancer with EGFR-activating mutations (RELAY phase 3 randomized study)

Manuscript number (if known): \_\_\_\_\_

In the interest of transparency, we ask you to disclose all relationships/activities/interests listed below that are related to the content of your manuscript. "Related" means any relation with for-profit or not-for-profit third parties whose interests may be affected by the content of the manuscript. Disclosure represents a commitment to transparency and does not necessarily indicate a bias. If you are in doubt about whether to list a relationship/activity/interest, it is preferable that you do so.

The following questions apply to the author's relationships/activities/interests as they relate to the current manuscript only.

The author's relationships/activities/interests should be defined broadly. For example, if your manuscript pertains to the epidemiology of hypertension, you should declare all relationships with manufacturers of antihypertensive medication, even if that medication is not mentioned in the manuscript.

In item #1 below, report all support for the work reported in this manuscript without time limit. For all other items, the time frame for disclosure is the past 36 months.

|                                                           |                                                                                                                                                                                | Name all entities with whom you have this relationship or indicate none (add rows as needed) | Specifications/Comments (e.g., if payments were made to you or to your institution) |
|-----------------------------------------------------------|--------------------------------------------------------------------------------------------------------------------------------------------------------------------------------|----------------------------------------------------------------------------------------------|-------------------------------------------------------------------------------------|
| <b>Time frame: Since the initial planning of the work</b> |                                                                                                                                                                                |                                                                                              |                                                                                     |
| 1                                                         | All support for the present manuscript (e.g., funding, provision of study materials, medical writing, article processing charges, etc.)<br><b>No time limit for this item.</b> | Eli Lilly and Company                                                                        | Eli Lilly funded all support for the present manuscript                             |
|                                                           |                                                                                                                                                                                |                                                                                              |                                                                                     |
|                                                           |                                                                                                                                                                                |                                                                                              |                                                                                     |
|                                                           |                                                                                                                                                                                |                                                                                              |                                                                                     |
|                                                           |                                                                                                                                                                                |                                                                                              |                                                                                     |
|                                                           |                                                                                                                                                                                |                                                                                              |                                                                                     |
| <b>Time frame: past 36 months</b>                         |                                                                                                                                                                                |                                                                                              |                                                                                     |
| 2                                                         | Grants or contracts from any entity (if not indicated in item #1 above).                                                                                                       | <input checked="" type="checkbox"/> None                                                     |                                                                                     |
| 3                                                         | Royalties or licenses                                                                                                                                                          | <input checked="" type="checkbox"/> None                                                     |                                                                                     |
| 4                                                         | Consulting fees                                                                                                                                                                | <input checked="" type="checkbox"/> None                                                     |                                                                                     |

|    |                                                                                                              |                                          |  |
|----|--------------------------------------------------------------------------------------------------------------|------------------------------------------|--|
|    |                                                                                                              |                                          |  |
| 5  | Payment or honoraria for lectures, presentations, speakers bureaus, manuscript writing or educational events | <input checked="" type="checkbox"/> None |  |
| 6  | Payment for expert testimony                                                                                 | <input checked="" type="checkbox"/> None |  |
| 7  | Support for attending meetings and/or travel                                                                 | <input checked="" type="checkbox"/> None |  |
| 8  | Patents planned, issued or pending                                                                           | <input checked="" type="checkbox"/> None |  |
| 9  | Participation on a Data Safety Monitoring Board or Advisory Board                                            | <input checked="" type="checkbox"/> None |  |
| 10 | Leadership or fiduciary role in other board, society, committee or advocacy group, paid or unpaid            | <input checked="" type="checkbox"/> None |  |
| 11 | Stock or stock options                                                                                       | Stock of Eli Lilly and Company           |  |
| 12 | Receipt of equipment, materials, drugs, medical writing, gifts or other services                             | <input checked="" type="checkbox"/> None |  |
| 13 | Other financial or non-financial interests                                                                   | Employee of Eli Lilly Japan              |  |

**Please summarize the above conflict of interest in the following box:**

The author reports the funding from Eli Lilly and Company. The author is also an employee of Eli Lilly Japan K.K. and is minor shareholder of Eli Lilly and Company.

**Please place an "X" next to the following statement to indicate your agreement:**

**X I certify that I have answered every question and have not altered the wording of any of the questions on this form.**

## ICMJE DISCLOSURE FORM

Date: 8/9/2022

Your Name: Kazuhiko NAKAGAWA

Manuscript Title: Impact of ramucirumab plus erlotinib on circulating cell-free DNA from patients with untreated metastatic non-small cell lung cancer with EGFR-activating mutations (RELAY phase 3 randomized study)

Manuscript number (if known): \_\_\_\_\_

In the interest of transparency, we ask you to disclose all relationships/activities/interests listed below that are related to the content of your manuscript. "Related" means any relation with for-profit or not-for-profit third parties whose interests may be affected by the content of the manuscript. Disclosure represents a commitment to transparency and does not necessarily indicate a bias. If you are in doubt about whether to list a relationship/activity/interest, it is preferable that you do so.

The following questions apply to the author's relationships/activities/interests as they relate to the current manuscript only.

The author's relationships/activities/interests should be defined broadly. For example, if your manuscript pertains to the epidemiology of hypertension, you should declare all relationships with manufacturers of antihypertensive medication, even if that medication is not mentioned in the manuscript.

In item #1 below, report all support for the work reported in this manuscript without time limit. For all other items, the time frame for disclosure is the past 36 months.

|                                                           |                                                                                                                                                                                | Name all entities with whom you have this relationship or indicate none (add rows as needed) | Specifications/Comments (e.g., if payments were made to you or to your institution) |
|-----------------------------------------------------------|--------------------------------------------------------------------------------------------------------------------------------------------------------------------------------|----------------------------------------------------------------------------------------------|-------------------------------------------------------------------------------------|
| <b>Time frame: Since the initial planning of the work</b> |                                                                                                                                                                                |                                                                                              |                                                                                     |
| 1                                                         | All support for the present manuscript (e.g., funding, provision of study materials, medical writing, article processing charges, etc.)<br><b>No time limit for this item.</b> | Eli Lilly and Company                                                                        | Eli Lilly funded all support for the present manuscript                             |
|                                                           |                                                                                                                                                                                |                                                                                              |                                                                                     |
|                                                           |                                                                                                                                                                                |                                                                                              |                                                                                     |
|                                                           |                                                                                                                                                                                |                                                                                              |                                                                                     |
|                                                           |                                                                                                                                                                                |                                                                                              |                                                                                     |
|                                                           |                                                                                                                                                                                |                                                                                              |                                                                                     |
| <b>Time frame: past 36 months</b>                         |                                                                                                                                                                                |                                                                                              |                                                                                     |
| 2                                                         | Grants or contracts from any entity (if not indicated in item #1 above).                                                                                                       | AstraZeneca K.K.                                                                             | My institution                                                                      |
|                                                           |                                                                                                                                                                                | MSD K.K.                                                                                     | My institution                                                                      |
|                                                           |                                                                                                                                                                                | Ono Pharmaceutical Co.,Ltd.                                                                  | My institution                                                                      |
|                                                           |                                                                                                                                                                                | Nippon Boehringer Ingelheim Co.,Ltd.                                                         | My institution                                                                      |
|                                                           |                                                                                                                                                                                | Novartis Pharma K.K.                                                                         | My institution                                                                      |
|                                                           |                                                                                                                                                                                | Pfizer Japan Inc.                                                                            | My institution                                                                      |

|   |                       |                                    |                |
|---|-----------------------|------------------------------------|----------------|
|   |                       | Bristol Myers Squibb Company       | My institution |
|   |                       | Eli Lilly Japan K.K.               | My institution |
|   |                       | Chugai Pharmaceutical Co.,Ltd.     | My institution |
|   |                       | Daiichi Sankyo Co., Ltd.           | My institution |
|   |                       | Merck Biopharma                    | My institution |
|   |                       | PAREXEL International Corp.        | My institution |
|   |                       | PRA HEALTHSCIENCES                 | My institution |
|   |                       | EPS Corporation.                   | My institution |
|   |                       | Kissei Pharmaceutical Co., Ltd.    | My institution |
|   |                       | EPS International Co.,Ltd,.        | My institution |
|   |                       | Taiho Pharmaceutical Co.,Ltd.      | My institution |
|   |                       | PPD-SNBL K.K                       | My institution |
|   |                       | SymBio Pharmaceuticals Limited.    | My institution |
|   |                       | IQVIA Services JAPAN K.K.          | My institution |
|   |                       | SYNEOS HEALTH CLINICAL K.K.        | My institution |
|   |                       | Nippon Kayaku Co.,Ltd.             | My institution |
|   |                       | EP-CRSU Co., Ltd.                  | My institution |
|   |                       | Mebix, Inc.                        | My institution |
|   |                       | Janssen Pharmaceutical K.K.        | My institution |
|   |                       | AbbVie Inc.                        | My institution |
|   |                       | Bayer Yakuhin, Ltd                 | My institution |
|   |                       | Eisai Co., Ltd.                    | My institution |
|   |                       | Mochida Pharmaceutical Co., Ltd.   | My institution |
|   |                       | Covance Japan Inc.                 | My institution |
|   |                       | Japan Clinical Research Operations | My institution |
|   |                       | Takeda Pharmaceutical Co.,Ltd.     | My institution |
|   |                       | GlaxoSmithKline K.K.               | My institution |
|   |                       | Sanofi K.K.                        | My institution |
|   |                       | Systemex Corporation               | My institution |
|   |                       | Medical Reserch Support            | My institution |
|   |                       | Otsuka Pharmaceutical Co., Ltd.    | My institution |
|   |                       | SRL, Inc.                          | My institution |
|   |                       | Pfizer R&D Japan G.K.              | My institution |
|   |                       | Amgen Inc.                         | My institution |
| 3 | Royalties or licenses | <input type="checkbox"/> None      |                |
|   |                       |                                    |                |
|   |                       |                                    |                |
| 4 | Consulting fees       | Eli Lilly Japan K.K.               | Myself         |
|   |                       | KYORIN Pharmaceutical              | Myself         |

|   |                                                                                                              |                                        |        |
|---|--------------------------------------------------------------------------------------------------------------|----------------------------------------|--------|
|   |                                                                                                              | Co., Ltd.                              |        |
|   |                                                                                                              | Ono Pharmaceutical Co.,Ltd.            | Myself |
|   |                                                                                                              | Pfizer Japan Inc.                      | Myself |
| 5 | Payment or honoraria for lectures, presentations, speakers bureaus, manuscript writing or educational events | Ono Pharmaceutical Co., Ltd.           | Myself |
|   |                                                                                                              | Amgen Inc.                             | Myself |
|   |                                                                                                              | Nippon Kayaku Co., Ltd.                | Myself |
|   |                                                                                                              | AstraZeneca K.K.                       | Myself |
|   |                                                                                                              | Chugai Pharmaceutical Co., Ltd.        | Myself |
|   |                                                                                                              | Eli Lilly Japan K.K.                   | Myself |
|   |                                                                                                              | MSD K.K.                               | Myself |
|   |                                                                                                              | Pfizer Japan Inc.                      | Myself |
|   |                                                                                                              | Nippon Boehringer Ingelheim Co., Ltd.  | Myself |
|   |                                                                                                              | Taiho Pharmaceutical Co.,Ltd.          | Myself |
|   |                                                                                                              | Bayer Yakuhin, Ltd.                    | Myself |
|   |                                                                                                              | CMIC ShiftZero K.K.                    | Myself |
|   |                                                                                                              | Life Technologies Japan Ltd.           | Myself |
|   |                                                                                                              | Neo Communication                      | Myself |
|   |                                                                                                              | Roche Diagnostics K.K.                 | Myself |
|   |                                                                                                              | AbbVie Inc.                            | Myself |
|   |                                                                                                              | Merck Biopharma Co., Ltd.              | Myself |
|   |                                                                                                              | Kyowa Kirin Co., Ltd.                  | Myself |
|   |                                                                                                              | Takeda Pharmaceutical Co., Ltd.        | Myself |
|   |                                                                                                              | 3H Clinical Trial Inc.                 | Myself |
|   |                                                                                                              | Care Net, Inc.                         | Myself |
|   |                                                                                                              | Medical Review Co., Ltd.               | Myself |
|   |                                                                                                              | Medical Mobile Communications co., Ltd | Myself |
|   |                                                                                                              | YODOSHA CO., LTD.                      | Myself |
|   |                                                                                                              | Nikkei Business Publications, Inc.     | Myself |
|   |                                                                                                              | Japan Clinical Research Operations     | Myself |
|   |                                                                                                              | Novartis Pharma K.K.                   | Myself |
|   |                                                                                                              | CMIC Co., Ltd.                         | Myself |
|   |                                                                                                              | TAIYO Pharma Co., Ltd.                 | Myself |
|   |                                                                                                              | KYORIN Pharmaceutical Co., Ltd.        | Myself |
|   |                                                                                                              | Bristol-Myers Squibb K.K.              | Myself |
|   |                                                                                                              |                                        |        |
| 6 | Payment for expert testimony                                                                                 | <input type="checkbox"/> None          |        |
|   |                                                                                                              |                                        |        |
|   |                                                                                                              |                                        |        |
| 7 | Support for attending                                                                                        | <input type="checkbox"/> None          |        |

|    |                                                                                                   |                                          |                |
|----|---------------------------------------------------------------------------------------------------|------------------------------------------|----------------|
|    | meetings and/or travel                                                                            |                                          |                |
| 8  | Patents planned, issued or pending                                                                | Daiichi Sankyo Co., Ltd.                 | My institution |
| 9  | Participation on a Data Safety Monitoring Board or Advisory Board                                 | <input checked="" type="checkbox"/> None |                |
| 10 | Leadership or fiduciary role in other board, society, committee or advocacy group, paid or unpaid | <input checked="" type="checkbox"/> None |                |
| 11 | Stock or stock options                                                                            | <input checked="" type="checkbox"/> None |                |
| 12 | Receipt of equipment, materials, drugs, medical writing, gifts or other services                  | <input checked="" type="checkbox"/> None |                |
| 13 | Other financial or non-financial interests                                                        | <input checked="" type="checkbox"/> None |                |

**Please summarize the above conflict of interest in the following box:**

The author reports the funding from Eli Lilly and Company and grants or contracts to their institution from AbbVie, Amgen, AstraZeneca K.K., Bayer Yakuhin, Bristol Myers Squibb, Chugai Pharmaceutical, Covance Japan, Daiichi Sankyo, Eisai, Eli Lilly Japan K.K., EP-CRSU, EPS Corporation, EPS International, GlaxoSmithKline K.K., IQVIA Services Japan K.K., Janssen Pharmaceutical K.K., Japan Clinical Research Operations, Kissei Pharmaceutical, Mebix, Medical Research Support, Merck Biopharma, Merck Sharp & Dohme K.K., Mochida Pharmaceutical, Nippon Boehringer Ingelheim, Nippon Kayaku, Novartis Pharma K.K., Ono Pharmaceutical, Otsuka Pharmaceutical, Parexel, Pfizer Japan, Pfizer R&D Japan G.K., PPD-SNBL K.K., PRA Health Sciences, Sanofi K.K., SRL, Symbio Pharmaceuticals, Syneos Health Clinical K.K., Sysmex Corporation, Taiho Pharmaceutical, and Takeda; consulting fees from Eli Lilly Japan K.K., KYORIN Pharmaceutical, Ono Pharmaceutical, and Pfizer Japan; payment or honoraria from 3H Clinical Trial, AbbVie, Amgen, AstraZeneca K.K., Bayer Yakuhin, Bristol Myers Squibb K.K., Care Net, Chugai Pharmaceutical, CMIC, CMIC ShiftZero K.K., Eli Lilly Japan K.K., Japan Clinical Research Operations, KYORIN Pharmaceutical, Kyowa Kirin, Life Technologies Japan, Medical Mobile Communications, Medical Review, Merck Serono, Merck Sharp & Dohme K.K., Neo Communications, Nikkei Business Publications, Nippon Boehringer Ingelheim, Nippon Kayaku, Novartis Pharma K.K., Ono Pharmaceutical, Pfizer Japan, Roche Diagnostics K.K., Taiho Pharmaceutical, TAIYO Pharma, Takeda Pharmaceutical, and YODOSHA; and patents planned, issued, or pending with Daiichi Sankyo and their institution.

**Please place an "X" next to the following statement to indicate your agreement:**

I certify that I have answered every question and have not altered the wording of any of the questions on this form.
