# Supplementary material for: Impact of ramucirumab plus erlotinib on circulating cell-free DNA from patients with untreated metastatic non-small cell lung cancer with EGFR-activating mutations (RELAY phase 3 randomized study)
Source: PubMed Central journal article supplement — Transl Lung Cancer Res. 2023 Aug 10;12(8):1702–16. doi: 10.21037/tlcr-22-736 (PMC10483085; doi:10.21037/tlcr-22-736), 2023-08-10
Supplement: tlcr-12-08-1702-dss.pdf [file tlcr-12-08-1702-dss.pdf]

## Data Sharing Statement

|                     |                                                                                                                                                    |                                                                                                                                                                                                         |
|---------------------|----------------------------------------------------------------------------------------------------------------------------------------------------|---------------------------------------------------------------------------------------------------------------------------------------------------------------------------------------------------------|
| <b>Article Info</b> | <a href="https://dx.doi.org/10.21037/tlcr-22-736">https://dx.doi.org/10.21037/tlcr-22-736</a>                                                      |                                                                                                                                                                                                         |
| <b>Item</b>         | <b>Question</b>                                                                                                                                    | <b>Authors' Response<br/>(place "-" if not applicable)</b>                                                                                                                                              |
| 1                   | Would you like to share data collected for your study to others?                                                                                   | No.                                                                                                                                                                                                     |
| 2                   | If not, would you like to share the reason for your decision?                                                                                      | This manuscript reports the results of an exploratory addendum biomarker study of the RELAY randomized, double-blind, placebo-controlled, phase 3 study; data are therefore of exploratory nature only. |
| 3                   | What data in particular will be shared?                                                                                                            | -                                                                                                                                                                                                       |
| 4                   | Any other documents will be share? Such as study protocol, statistical analysis plan, informed consent form, clinical study report, analytic code. | The protocol for the RELAY, randomized, double-blind, placebo-controlled, phase 3 trial protocol is available as supplementary material to the RELAY primary disclosure.                                |
| 5                   | When will data availability begin?                                                                                                                 | -                                                                                                                                                                                                       |
| 6                   | When will data availability end?                                                                                                                   | -                                                                                                                                                                                                       |
| 7                   | To whom will you share the data?                                                                                                                   | -                                                                                                                                                                                                       |
| 8                   | For what type of analysis or purpose?                                                                                                              | -                                                                                                                                                                                                       |
| 9                   | How or where can the data/documents be obtained?                                                                                                   | Refer to Nakagawa K, et al. <i>Lancet Oncol</i> 2019;20: 1655-69.                                                                                                                                       |
| 10                  | Any other restrictions?                                                                                                                            | -                                                                                                                                                                                                       |
