# Supplementary material for: Impact of ramucirumab plus erlotinib on circulating cell-free DNA from patients with untreated metastatic non-small cell lung cancer with EGFR-activating mutations (RELAY phase 3 randomized study)
Source: PubMed Central journal article supplement — Transl Lung Cancer Res. 2023 Aug 10;12(8):1702–16. doi: 10.21037/tlcr-22-736 (PMC10483085; doi:10.21037/tlcr-22-736), 2023-08-10
Supplement: tlcr-12-08-1702-supplementary.pdf [file tlcr-12-08-1702-supplementary.pdf]

**Table S1** Ethics review board approval dates and locations

| Study site number | ERB approval date | Study site center name                                         | Prefecture | Country |
|-------------------|-------------------|----------------------------------------------------------------|------------|---------|
| 651               | 21-Apr-2015       | Shizuoka Cancer Center                                         | Shizuoka   | Japan   |
| 652               | 21-Apr-2015       | Kindai University Hospital                                     | Osaka      | Japan   |
| 653               | 13-May-2015       | Japanese Foundation for Cancer Research                        | Tokyo      | Japan   |
| 654               | 14-Oct-2015       | National Cancer Center Hospital East                           | Chiba      | Japan   |
| 655               | 14-May-2015       | National Hospital Organization Kyushu Cancer Center            | Fukuoka    | Japan   |
| 656               | 19-May-2015       | Okayama University Hospital                                    | Okayama    | Japan   |
| 657               | 13-May-2015       | National Cancer Center Hospital                                | Tokyo      | Japan   |
| 658               | 25-Dec-2015       | Tokyo Met Cancer & Infectious Diseases Center Komagome Hp      | Tokyo      | Japan   |
| 659               | 25-Nov-2015       | Saitama Prefectural Cancer Center                              | Saitama    | Japan   |
| 660               | 02-Nov-2015       | Chiba University Hospital                                      | Chiba      | Japan   |
| 661               | 18-Nov-2015       | Kyoto University Hospital                                      | Kyoto      | Japan   |
| 662               | 19-Jan-2016       | Kansai Medical University Hospital                             | Osaka      | Japan   |
| 663               | 26-Oct-2015       | Nagasaki University Hospital                                   | Nagasaki   | Japan   |
| 664               | 20-Nov-2015       | Osaka City General Hospital                                    | Osaka      | Japan   |
| 665               | 05-Jan-2016       | Kyushu University Hospital                                     | Fukuoka    | Japan   |
| 666               | 04-Dec-2015       | Foundation for Biomedical Research and innovation              | Hyogo      | Japan   |
| 667               | 10-Dec-2015       | Hyogo Cancer Center                                            | Hyogo      | Japan   |
| 668               | 10-Nov-2015       | Kanagawa Cardiovascular and Respiratory Center                 | Kanagawa   | Japan   |
| 669               | 11-Nov-2015       | Kanazawa University Hospital                                   | Ishikawa   | Japan   |
| 670               | 18-Jan-2016       | National Hospital Organization Kinki-chuo Chest Medical Center | Osaka      | Japan   |
| 671               | 18-Nov-2015       | Kurume University Hospital                                     | Fukuoka    | Japan   |
| 672               | 19-Nov-2015       | Osaka International Cancer Institute                           | Osaka      | Japan   |
| 673               | 28-Oct-2015       | National Hospital Organization Yamaguchi Ube Medical Center    | Yamaguchi  | Japan   |
| 674               | 23-Aug-2016       | Aichi Cancer Center Hospital                                   | Aichi      | Japan   |
| 675               | 25-Feb-2016       | Wakayama Medical University Hospital                           | Wakayama   | Japan   |
| 676               | 15-Jan-2016       | Niigata Cancer Center Hospital                                 | Niigata    | Japan   |
| 678               | 24-Dec-2015       | Niigata University Medical & Dental Hospital                   | Niigata    | Japan   |
| 679               | 24-Mar-2016       | National Hospital Organization Shikoku Cancer Center           | Ehime      | Japan   |
| 680               | 22-Dec-2015       | Kishiwada City Hospital                                        | Osaka      | Japan   |
| 681               | 13-Jan-2016       | Juntendo University Hospital                                   | Tokyo      | Japan   |
| 682               | 20-Jan-2016       | Osaka Habikino Medical Center                                  | Osaka      | Japan   |
| 683               | 17-Dec-2015       | Osaka City University Hospital                                 | Osaka      | Japan   |
| 684               | 15-Dec-2015       | Kobe City Medical Center General Hospital                      | Hyogo      | Japan   |
| 685               | 19-Jan-2016       | National Hospital Organization Asahikawa Medical Center        | Hokkaido   | Japan   |
| 686               | 28-Dec-2015       | Nippon Medical School Hospital                                 | Tokyo      | Japan   |
| 688               | 10-Feb-2016       | St. Luke's International Hospital                              | Tokyo      | Japan   |
| 689               | 22-Jan-2016       | Kanagawa Cancer Center                                         | Kanagawa   | Japan   |
| 690               | 02-Feb-2016       | National Hospital Organization Kyushu Medical Center           | Fukuoka    | Japan   |
| 691               | 25-May-2016       | Nagoya Medical Center                                          | Aichi      | Japan   |
| 692               | 13-Feb-2017       | Hyogo Prefectural Amagasaki General Medical Center             | Hyogo      | Japan   |
| 693               | 08-Mar-2017       | Himeji Medical Center                                          | Hyogo      | Japan   |
| 694               | 15-Feb-2017       | Sendai Kousei Hospital                                         | Miyagi     | Japan   |

ERB, ethics review board.

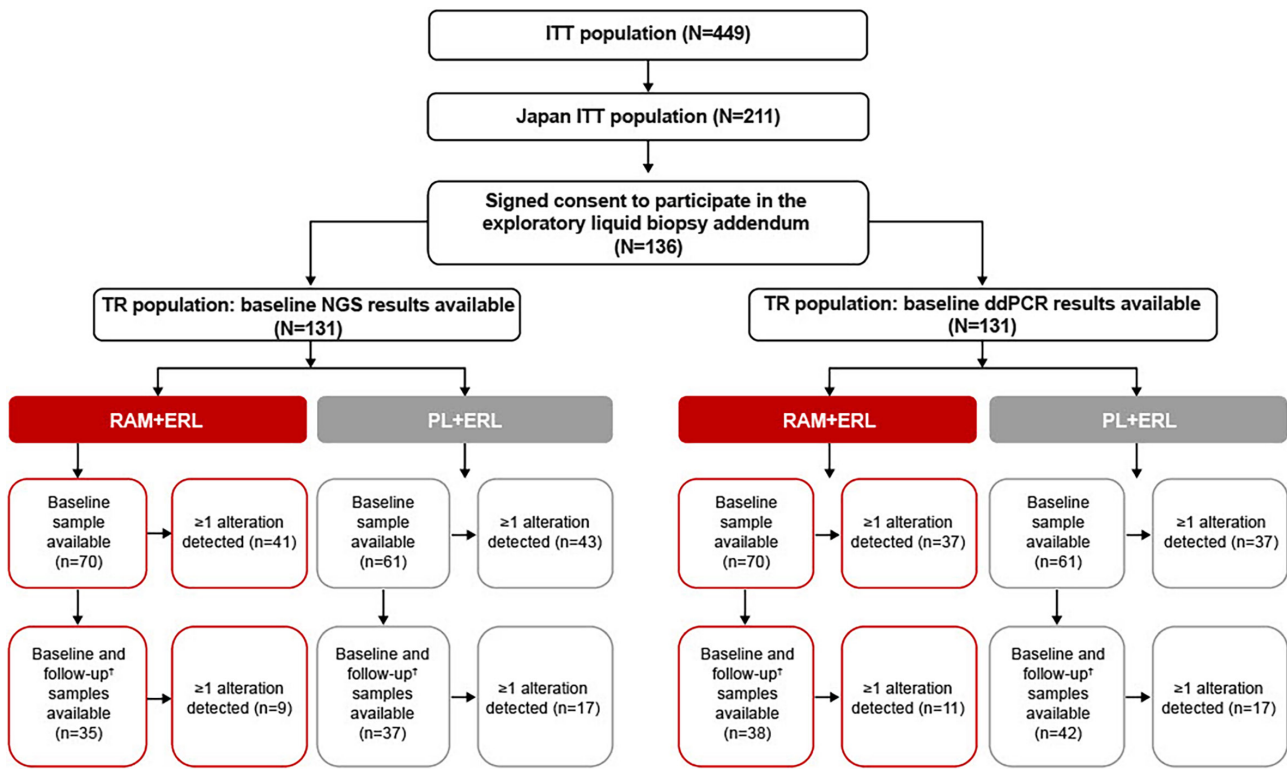

**Figure S1** Exploratory liquid biopsy addendum patient flow diagram. <sup>†</sup>Follow-up was defined as 30-day post-study treatment discontinuation. ddPCR, droplet digital polymerase chain reaction; ERL, erlotinib; ITT, intent-to-treat; NGS, next-generation sequencing; PL, placebo; RAM, ramucirumab; TR, translational research.

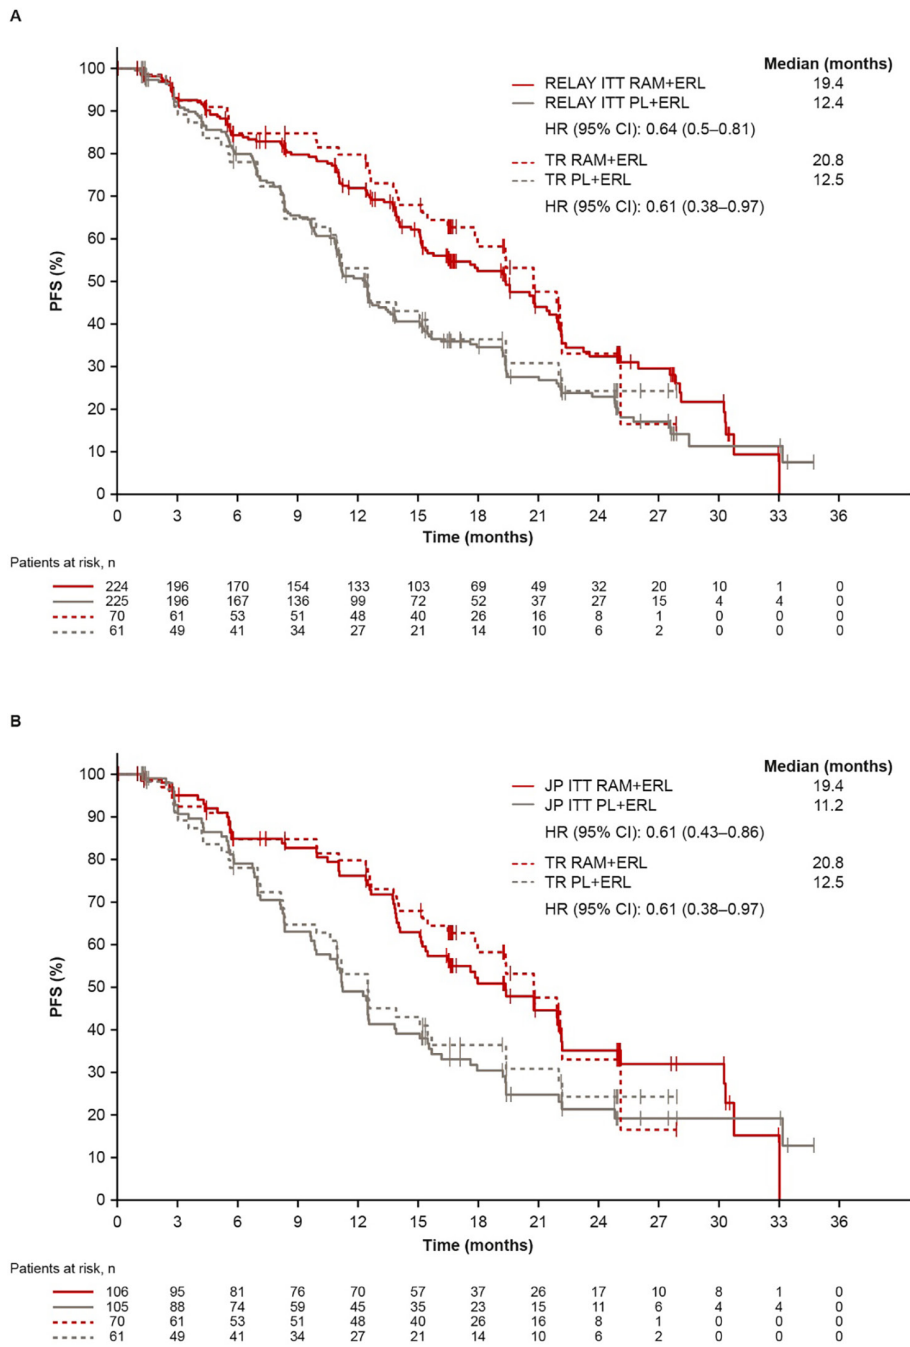

**Figure S2** Kaplan-Meier plot of PFS for the TR population and comparison with the (A) RELAY ITT and (B) JP ITT populations. CI, confidence interval; ERL, erlotinib; HR, unstratified hazard ratio; ITT, intent-to-treat; JP, Japanese; PFS, progression-free survival; PL, placebo; RAM, ramucirumab; TR, translational research.

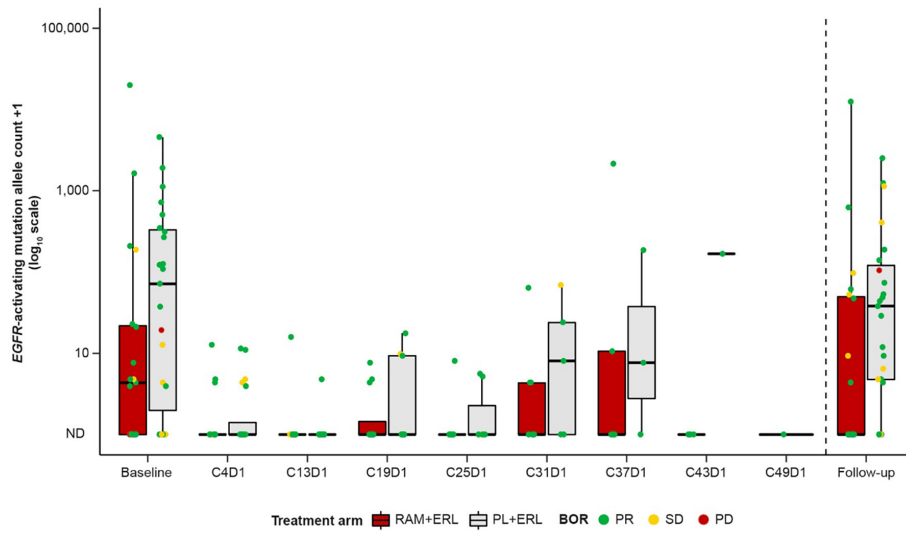

**Figure S3** *EGFR*-activating mutation allele count (TR population, patients with a valid baseline sample). BOR, best overall response; C, Cycle; D, Day; *EGFR*, epidermal growth factor receptor; ERL, erlotinib; ND, not detected; PD, progressive disease; PL, placebo; PR, partial response; RAM, ramucirumab; SD, stable disease; TR, translational research.

### Baseline

- The total cfDNA content is the sum of tumor-derived cfDNA and cfDNA from normal cells in the tumor microenvironment (e.g., stroma and pericytes).
- cfDNA fragment lengths are frequently shorter than normal cfDNA fragments.

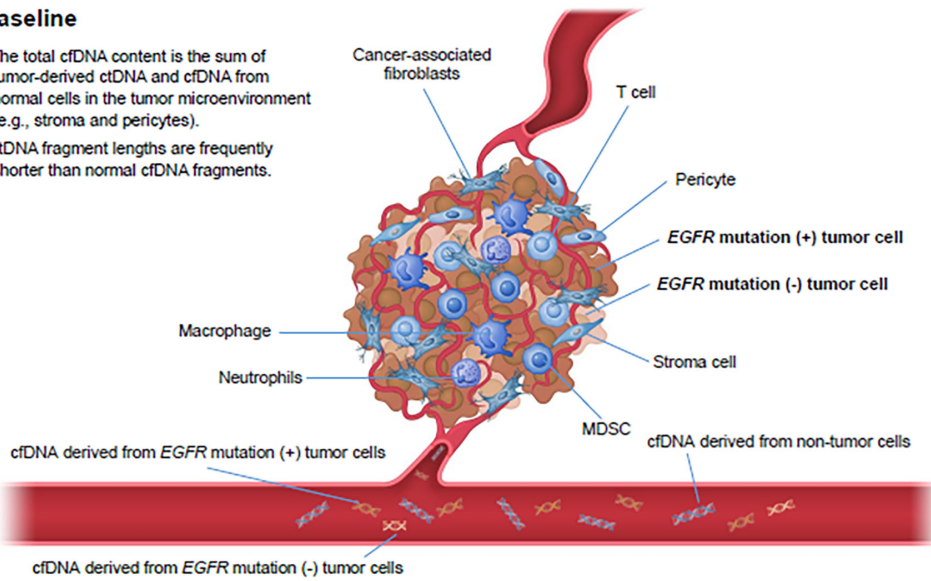

### Cycle 4: PL+ERL

- At Cycle 4, no *EGFR*-activating mutation was detectable in 67% (20/30) of patients in the PL+ERL arm.
- cfDNA levels did not increase in the PL+ERL arm.

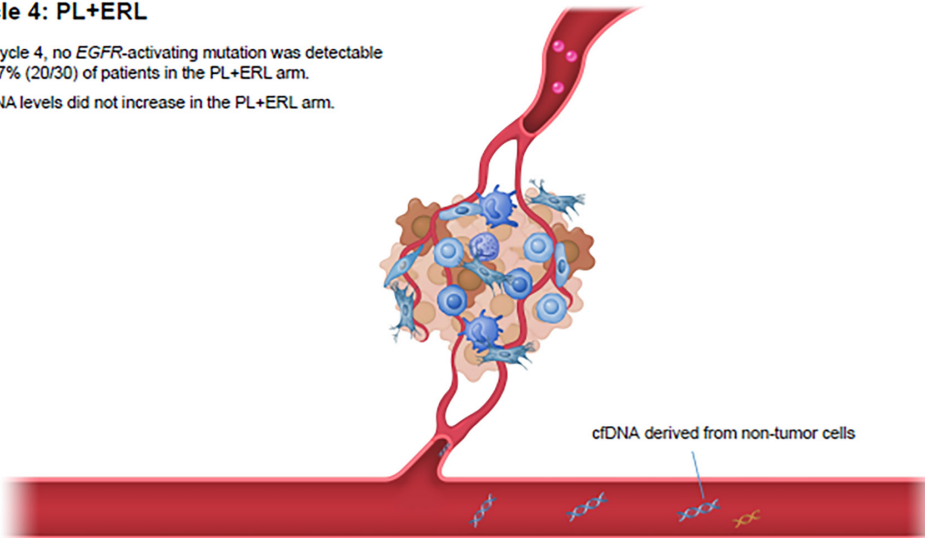

### Cycle 4: RAM+ERL

- At Cycle 4, no *EGFR*-activating mutation was detectable in 78% (21/27) of patients in the RAM+ERL arm.
- Increased levels of total cfDNA in the RAM+ERL arm were observed.
- Fragment size of the total cfDNA content in the RAM+ERL samples was shorter than that in the PL+ERL samples.
- Results suggest that the increased total cfDNA levels in the RAM+ERL arm are likely due to increased tumor cell apoptosis.

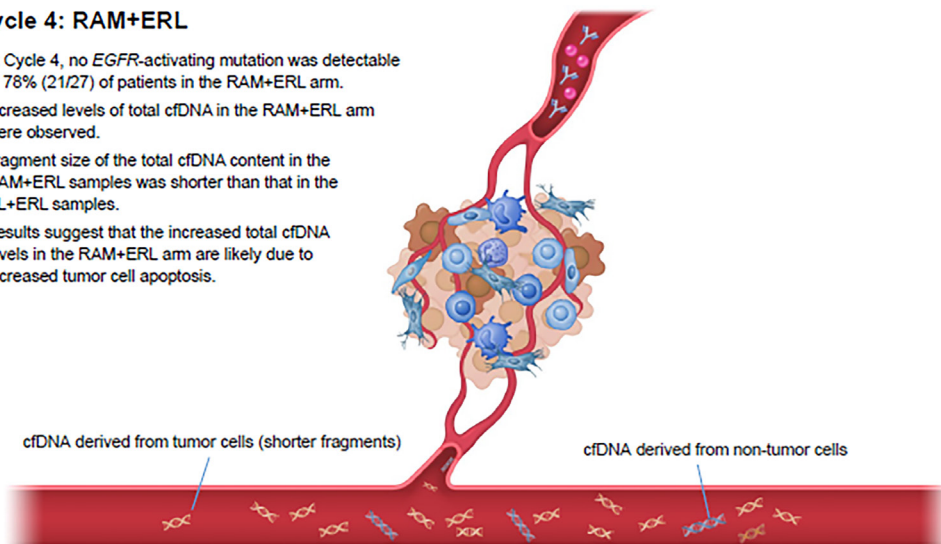

### Long-term effect: RAM+ERL

- Total cfDNA concentration increased in the RAM+ERL arm and was sustained throughout treatment.
- Fragment size of the total cfDNA content in the RAM+ERL arm was shorter than that in the PL+ERL arm throughout treatment, indicating that tumor cells were dying continuously throughout the treatment period in patients treated with RAM+ERL.

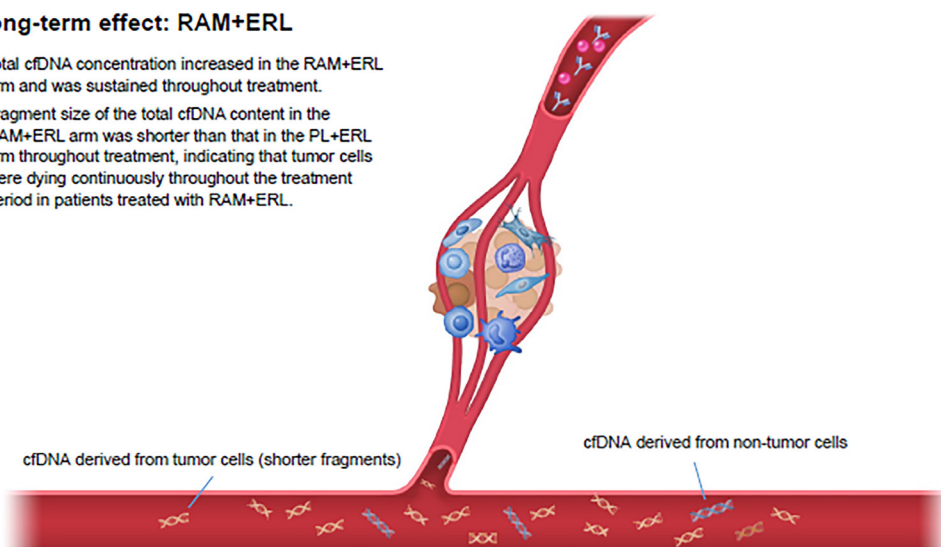

**Figure S4** Hypothesized changes in total cfDNA content over time with RAM + ERL or PL + ERL treatment. cfDNA, cell-free DNA; EGFR, epidermal growth factor receptor; ERL, erlotinib; MDSC, myeloid-derived suppressor cell; PL, placebo; RAM, ramucirumab.
